# Supplementary material for: Manganese Superoxide Dismutase and Breast Cancer Recurrence: A Danish Clinical Registry-Based Case-Control Study, and a Meta-Analysis
Source: PubMed Central journal article supplement (PMC3909115; doi:10.1371/journal.pone.0087450), 2014-01-31

**Figure A: Funnel plot showing little evidence of publication bias in studies investigating the association of two *SOD2* polymorphisms with outcomes in breast cancer patients.**

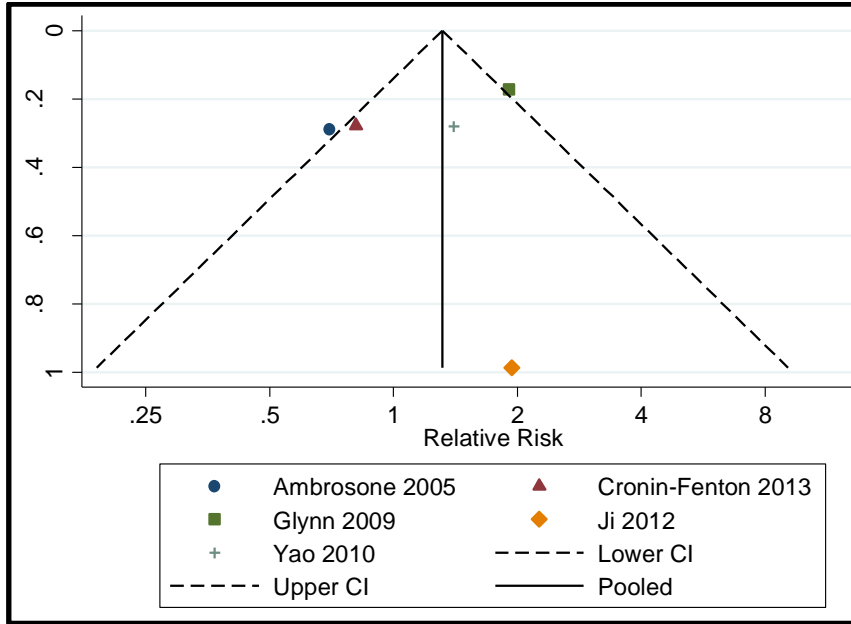

**Figure B: Funnel plot showing little evidence of publication bias in studies investigating the association of any *SOD2* polymorphisms with outcomes in breast cancer patients.**

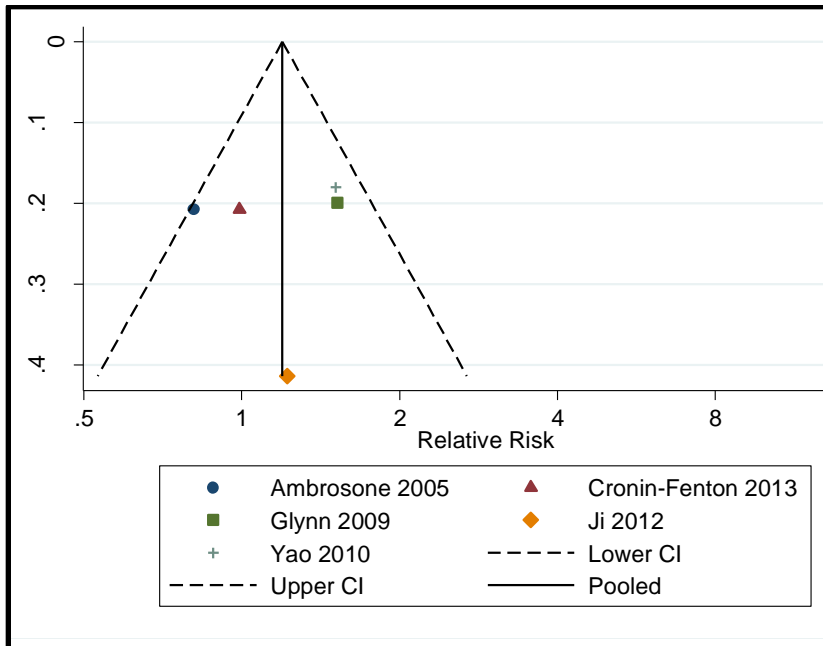

Supplement: pone.0087450.s001.pdf [file pone.0087450.s001.pdf]
